1

1 Full title: Trends of the Florida manatee (*Trichechus manatus latirostris*)

2 rehabilitation admissions 1991-2017.

3 Short title: Florida manatee (*Trichechus manatus latirostris*) rehabilitation

4 epidemiology.

5

6 Ray L. Ball, <sup>1\*#¶</sup>, Markku Malmi, <sup>2¶</sup>, Janice Zgibor, <sup>2¶</sup>

7

8 <sup>1</sup> ZooTampa at Lowry Park, Department of Medical Sciences, 110 W Sligh Avenue Tampa, FL,

9 33604, USA

10 <sup>2</sup> University of South Florida, College of Public Health, Tampa, FL 33620 USA

11 #Current address: Visiting Assistant Professor, Department of Biology, Eckerd College, St.

12 Petersburg, Florida, 33711, USA

13

14 \* Corresponding author

15 E-mail: ballrl@eckerd.edu

16

17 ¶These authors contributed equally to this work

## 18 Abstract

19 A retrospective study of admission data of 401 West Indian manatees (*Trichechus*  
20 *manatus latirostris*) presented to the David A. Straz Jr. Manatee Critical Care Center at  
21 ZooTampa at Lowry Park (ZooTampa) for rehabilitation from August 1991 through October  
22 2017. Causes of admittance, location of rescue, gender, and age class were all recorded for each  
23 manatee admitted. Admittance categories as defined by the Florida Fish and Wildlife  
24 Conservation Commission (FWC) included watercraft collisions, natural causes, entanglement,  
25 entrapment, orphaned calves, captive born, mothers of rescued calves, calves of rescued mothers,  
26 human, and other. The admitted population was primarily from the southwest and northwest  
27 coasts and related waterways of Florida. The gender difference was relatively equivocal (54%  
28 female) while the adults comprised 79% of the admissions. The overall total admissions  
29 increased steadily over the study period as did the admissions for each individual categories of  
30 admission. Watercraft collisions and natural causes combined were 71% of all admissions for  
31 the entire study period and are the dominant causes of admission. Watercraft collisions are more  
32 likely to occur during May through October, whereas natural causes of admittance are more  
33 likely to occur between December and March. Rehabilitated manatees may reduce overall  
34 manatee mortality and can provide insight into population-based health concerns if evaluated  
35 appropriately. Future efforts can incorporate physical examination findings, hematology,  
36 biochemistry profiles, and ancillary diagnostic testing to continue to improve the individual  
37 welfare of this marine mammal in its natural range. Admissions data could also potentially serve  
38 the wider conservation and recovery efforts if it is proven that the data obtained is at least as  
39 informative as that obtained by the carcass salvage program. Limited conservation resources

3

40 could then be re-directed as new challenges arise with the expanding population and potentially  
41 expanding range of this species.

42

43

## 44 Introduction

45 The West Indian manatee is comprised of two subspecies; the Antillean (*Trichechus*  
46 *manatus manatus*) and the Florida manatee (*Trichechus manatus latirostris*). Watercraft-related  
47 deaths and potential loss of warm water refuges are the primary threat to manatee populations  
48 [1]. In addition to these threats, drowning due to canal locks and flood gates, entanglement in  
49 fishing gear, cold exposure, red tide outbreaks, and habitat loss have all contributed manatee  
50 morbidity and mortality and necessitated manatee rescues. The Marine Mammal Protection Act  
51 of 1972 [2], Endangered Species Act of 1973 [3], and the Florida Manatee Sanctuary Act of  
52 1978 [4] prohibit any killing, capture, or inhumane harassment of manatees. The West Indian  
53 manatee Recovery Plan [5] was implemented in March 1980 and provided a framework to  
54 provide protection of this species. As a result of actions such as enforcement of manatee speed  
55 zones in waterways, providing manatee sanctuaries, restoration of aquatic vegetation, and  
56 education on manatee conservation, the population of the Florida manatee steadily climbed. In  
57 1991, there were an estimated 1,267 Florida manatees, whereas in early 2017 the population was  
58 estimated at 6,620 [6]. As of March 30, 2017, the endangered status of the West Indian manatee  
59 has been changed to “Threatened” by the United States Fish and Wildlife Service (FWS) under  
60 the Endangered Species Act [7]. This change does not affect other federal and state protections  
61 afforded manatees.

62 There are four manatee management units in Florida which include the Upper St. John’s  
63 River with an estimated 4% of the population, the Atlantic Coast with 46% of the population,  
64 Southwest Florida with 38% of the population, and Northwest Florida with 12% of the  
65 population. ZooTampa, Miami Sea Aquarium, Sea World Orlando, and Jacksonville Zoo, are  
66 federally permitted critical care facilities for manatee rehabilitation. Identifying the effectiveness

67 of the rehabilitation efforts is essential to all rehabilitation programs and the foundation for  
68 improved release rates, enhanced welfare, and optimal use of resources. This analysis of  
69 manatee admittance data at ZooTampa seeks to identify trends of admission rates and locations  
70 of rescue stratified by cause of admittance, age, and gender between January 1991 and October  
71 2017. Preliminary analysis of the admittance data may also be useful to predict trends within the  
72 population, especially if the rehabilitation data on individual admissions can be summarized and  
73 parallels the trends seen in the wild population.

74

## 75 Materials and Methods

76 ZooTampa, formerly Lowry Park Zoo, has been rehabilitating injured and distressed  
77 Florida manatees since August 1991. Manatees that have obvious injuries or are exhibiting  
78 abnormal behaviors such as unusual buoyancy and lethargy are typically reported to FWC.  
79 Biologists are then dispatched to investigate and determine the need for intervention. Manatees  
80 determined to need medical assistance are captured by FWC teams and transported to one of the  
81 four federally permitted rehabilitation centers in Florida. Because qualified, practicing  
82 veterinarians are not typically on the rescue site nor are they transporting manatees, no medical  
83 support is provided until arrival at a critical care facility. On arrival at ZooTampa, manatees are  
84 triaged, baseline data is collected including blood sampling, lifesaving procedures are performed  
85 if indicated, and the vast majority of the manatees are hospitalized. The ZooTampa manatee  
86 medical database from August of 1991 through October 2017 was reviewed and included a total  
87 of 429 manatees. Data collection ended in October 2017 when the manatee care center  
88 underwent major renovations. Twenty-eight manatees were excluded due to incomplete data.

89 Study variables included gender, age class, cause of admittance, and location of rescue.  
90 Mortality, release, and days in hospital were also collected but are not reported here as they are  
91 related to outcomes. Admittance categories included watercraft collisions, natural causes (cold  
92 stress, brevetoxicosis, anything non-human related), other human causes (entanglement,  
93 entrapment, captive born, or other causes) and orphaned calves. Mothers of rescued calves and  
94 calves of rescued mothers were included in the appropriate category of the manatee requiring  
95 rehabilitation. Rehabilitated orphaned manatees must obtain 200cm before being qualified for  
96 release. Straight length criteria for manatees is utilized to categorize various life stages of  
97 manatees by the biologist. Calves are classified as < 235cm, sub-adults from 235 to 265cm, and  
98 adults > 265cm [8]. A criteria of 200cm was chosen for this study as that straight length is a  
99 determinant for both rescue and release criteria. Orphaned calves were defined for this study as  
100 calves less than 200cm straight length. Any isolated manatee less than 200cm is considered a  
101 dependent calf and will be rescued if possible. Calves undergoing rehabilitation must be 200cm  
102 before being considered for release.

103 FWC manages the manatee rescue and carcass salvage program and divides the Florida  
104 into 5 sections (Fig 1); Northeast (NE), East Coast (EC), Southeast (SE), Southwest (SW), and  
105 Northwest (NW). The Crystal River (CR) in Citrus County is geographically within the  
106 Northwest region but due to the density of manatees in this area and the growing human  
107 population, data is recorded for this area separately. Relationships between admittance  
108 categories, gender, age class, and rescue location were determined using statistical analysis  
109 system (SAS).

110 **Figure 1 inserted here.**

## 112 Results

113 Table 1 summarizes the gender and age stratification of the manatees admitted during the  
114 study period. Adults comprised 79% of the admissions with calves accounting for 21%. The  
115 vast majority of these calves were orphans, but injured calves were occasionally admitted with  
116 injuries along with their healthy dams (n=3) as well as healthy calves with injured dams (n=13).  
117 Females of all ages accounted for 54% of the admissions and males of all ages comprised 46% of  
118 admissions.

|                       | Male | Female | Total | % Population of total |
|-----------------------|------|--------|-------|-----------------------|
| Adult                 | 138  | 177    | 315   | 79                    |
| Calf                  | 46   | 40     | 86    | 21                    |
| Total                 | 184  | 217    | 401   |                       |
| % Population of total | 46   | 54     |       |                       |

119

120 Table 1. Manatee admissions data at ZooTampa August 1991 to October 2017.

121 Fig 2 summarizes the admissions data over the course of the study. Admittance was  
122 lowest in 1995 having only 1 admission and highest in 2013 with 34 manatees admitted. Fig 3  
123 demonstrates the percentage of admissions by cause. Within the admittance categories for the  
124 entire study period, natural causes were the highest with 36.2% of all admissions, followed by  
125 watercraft collisions at 34.9%. The third highest category was orphaned calves at 12.7%. No  
126 other individual categories had over 5% and they are represented here in one category, other  
127 human causes.

128 **Insert Figure 2 here**

129 **Insert Figure 3 here**

130 Figure 4 summarizes the trends in cause of admittance in 5-year time blocks over the  
131 study period. The last period, starting in 2011, was extended to the end of the study period when  
132 the rehabilitation center was closed. During this period an important change in the cause of  
133 admissions was noted with watercraft collisions becoming the dominant cause of admissions. In  
134 addition to an overall increase in admissions, each cause of admittance also tended to increase  
135 over the study period. Fig 5 demonstrates monthly admissions for the same time periods as in  
136 Fig 4. A consistent seasonal variation in total admittance was noted with the highest rates of  
137 admittance from January through April. Fig 6 demonstrates that there was also seasonal  
138 variation in peaks of admittance due to natural causes in the months of December through April,  
139 watercraft collisions May through August, and watercraft again October thru November.  
140 Admission of orphaned calves peaks in September and again in December. Orphaned calves  
141 comprise 45% of all the admitted calves.

142 **Insert Figure 4 here**

143 **Insert figure 5 here**

144 **Insert Figure 6 here**

145

146

147

148

149



150 Table 2 details the geographical demarcation of the recovery units and the associated  
151 percentages of manatee admissions from each region. Rescues and subsequent admissions  
152 primarily come from the coast of the Gulf of Mexico and related waterways. More specifically,  
153 the southwest and northwest coasts of Florida, including the Crystal River area, comprise just  
154 over 90% of all admissions.

155

156

157

| Location of Rescue | No. of manatees | % of total |
|--------------------|-----------------|------------|
| Northwest          | 127             | 31.7       |
| Southwest          | 215             | 53.7       |
| East Coast         | 18              | 4.4        |
| Northeast          | 10              | 2.4        |
| Southeast          | 6               | 1.5        |
| Crystal River      | 21              | 5.3        |
| Captive Born       | 4               | 1.0        |
| Total              | 401             | 100        |

158

159 Table 2. Number of manatees admitted to ZooTampa by region over the study period.

160

161 The two dominant causes of admission, natural and watercraft were then compared to  
162 each other and are summarized in Table 3.

163

164

| Variable                | Odds Ratio | 95%CI      | p-value |
|-------------------------|------------|------------|---------|
| Adult vs. Calf          | 1.26       | 0.29 5.53  | 0.76    |
| Female vs. Male         | 1.78       | 0.98 3.24  | 0.06    |
| Location of Rescue      |            |            |         |
| CR vs. SW               | 0.67       | 0.14 3.28  | 0.63    |
| EC vs. SW               | 0.20       | 0.03 1.53  | 0.13    |
| NE vs. SW               | 0.28       | 0.04 2.07  | 0.22    |
| NW vs. SW               | 1.20       | 0.42 3.46  | 0.73    |
| SE vs. SW               | 1.29       | 0.08 21.21 | 0.86    |
| Years                   |            |            |         |
| 1991-1995 vs. 2011-2017 | 3.12       | 0.25 38.83 | 0.38    |
| 1996-2000 vs. 2011-2017 | 0.78       | 0.26 2.27  | 0.64    |
| 2001-2005 vs. 2011-2017 | 0.49       | 0.19 1.24  | 0.13    |
| 2006-2010 vs. 2011-2017 | 0.90       | 0.39 2.07  | 0.80    |

165  
166 NW = Northwest; SW = Southwest; EC=East Coast; NE=Northeast; SE=Southeast; CR=Crystal River; CB=Captive Born  
167

168 Table 3. Comparison between age, gender, location, and 5-year periods between manatees  
169 admitted due to natural cause vs watercraft.

170

## 171 Discussion

172 The Florida manatee population has climbed from 1,267 in 1991 to 6,620 in 2017 and  
173 estimates are now as high as 10,280 [9]. This population recovery will inevitably lead to more  
174 human-manatee conflicts and it is expected to be in the form of watercraft collisions as noted in  
175 the most recent period of this study. Watercraft collisions have played a role in admittance rates  
176 in every year of the analysis. Natural causes didn't start having an impact until 1996 when a  
177 significant mortality event due to blooms of the dinoflagellate *Karenia brevis*, which resulted in  
178 brevetoxicosis [10]. Natural causes from that point forward continued to increase as a cause for  
179 admittance and include several significant cold stress related events. The shift in admissions  
180 from natural causes to watercraft noted in the recent years may reflect this increased human-

181 manatee interaction. Even with varied admission rates on an annual basis, the overall trend in  
182 admissions, both total and cause-specific, has been rising. The sustained trend in rising  
183 admissions over this extended period suggests a continued rise in admissions in the future.

184 The majority of those presented for rehabilitation at ZooTampa come primarily from the  
185 west coast, specifically southwest, which isn't surprising given the location of the facility. The  
186 northwest rescues did increase around the year 1999. This area includes the Crystal River  
187 system with a dense population of manatees. Possible causes could include increased use of an  
188 environmental resource, warm water, and/or a larger surveillance of this area. There was no  
189 significant difference in the measured parameters when comparing the two most dominant  
190 admission categories, natural and watercraft, to each other as seen in Table 3. No attributable risk  
191 could be assigned to any measured parameter when comparing the two causes of admissions.

192 The overall goal of obtaining and analyzing this data was to identify any trends in the  
193 admissions to better facilitate management practices to increase rehabilitation recovery rates.  
194 Confirming any seasonal tendencies in admission categories has practical applications in the  
195 resource management of the rehabilitation hospital and can reinforce public awareness  
196 campaigns regarding causes of human-related harm to manatees. Comparisons to all reported  
197 manatee rescue events with subsequent admissions for rehabilitation by the various wildlife  
198 agencies could prove the admissions data to serve as a useful proxy in the future in the event that  
199 manatees continue to be down-listed and rescue recovery efforts are streamlined or if the carcass  
200 salvage program is determined to no longer be valuable. The humanitarian effort could continue  
201 manatee rescue and rehabilitation, with its associate data collection replacing the data derived  
202 from the carcass salvage program. The data integrity could prove to be equivalent. Wildlife

203 rehabilitation can serve as sentinels of wildlife health [11] and perhaps this eventually could be  
204 the sentinel method for Florida manatees.

205         This initial analysis serves as a baseline and template for future analysis. Examining  
206 outcomes is the next step in an overall evaluation of rehabilitation efforts in manatees at a single  
207 facility. Mortality data, as well as details of hospitalization time, are also crucial to analyze in  
208 any rehabilitation program. Additional recommendations based on medical findings from  
209 admissions such as physical examination, hematology and serum biochemistry, and ancillary  
210 diagnostics can provide better point of care potential. This could lead to both diagnosis and even  
211 therapy on site of rescue, reducing or even eliminating some hospital admissions. Several  
212 specific causes of admissions, such as cold stress syndrome [12,13] and brevetoxicosis [14], have  
213 some initial data analysis with recommendations being made regarding new potential therapies  
214 for both syndromes. As a result of this work, atropine has been recommended for use in  
215 brevetoxicosis [14] and anticoagulants for cold stress syndrome [13]. Combining data sets from  
216 all the qualified manatee rehabilitation centers could add insight to trends noted here or point out  
217 any potential regional differences in terms of admission patterns.

218

## 219 Acknowledgements

220 Numerous veterinarians, veterinary technicians, and animal care staff have been involved with  
221 the success of the manatee rehabilitation program throughout its history at ZooTampa. We are  
222 also grateful for the efforts of the veterinary nursing staff of Heather Henry, Michelle Devlin,  
223 and Ryan O'Shea. The McCune and McCann Foundations were instrumental in providing  
224 funding for both clinical fellowships and resources to facilitate diagnostic investigations.

## 225 References

- 226 1. Runge MC, Sanders-Reed CA, Langtimm CA, Fonnesebeck CJ. 2007. A quantitative  
227 threats analysis for the Florida manatee (*Trichechus manatus latirostris*). U.S. Geological  
228 Survey. Open-File Report 2007-1086. 34 pp.
- 229 2. Marine Mammal Protection Act. 16 USC 1361-1407.  
230 <https://www.fws.gov/international/pdf/legislation-marine-mammal-protection-act.pdf>
- 231 3. Endangered Species Act of 1973. [https://www.fws.gov/endangered/esa-](https://www.fws.gov/endangered/esa-library/pdf/ESAall.pdf)  
232 [library/pdf/ESAall.pdf](https://www.fws.gov/endangered/esa-library/pdf/ESAall.pdf)
- 233 4. The Florida Manatee Sanctuary Act. Florida Administrative Code & Florida  
234 Administrative Register. Rule chapter 68C-22.  
235 <https://www.flrules.org/gateway/ChapterHome.asp?Chapter=68C-22>
- 236 5. Brownell, R. West Indian Manatee Recovery Plan.  
237 [https://www.fws.gov/northflorida/Manatee/Recovery%20Plan/1980\\_FWS\\_West\\_Indian](https://www.fws.gov/northflorida/Manatee/Recovery%20Plan/1980_FWS_West_Indian_Manatee_Recovery_Plan.pdf)  
238 [Manatee\\_Recovery\\_Plan.pdf](https://www.fws.gov/northflorida/Manatee/Recovery%20Plan/1980_FWS_West_Indian_Manatee_Recovery_Plan.pdf)
- 239 6. Manatee Synoptic Surveys. [https://myfwc.com/research/manatee/research/population-](https://myfwc.com/research/manatee/research/population-monitoring/synoptic-surveys/)  
240 [monitoring/synoptic-surveys/](https://myfwc.com/research/manatee/research/population-monitoring/synoptic-surveys/)
- 241 7. Department of the Interior, Fish and Wildlife Service. Endangered and Threatened  
242 Wildlife and Plants; Reclassification of the West Indian Manatee From Endangered to  
243 Threatened 50 CFR Part 17. RIN 1018-AY84. [https://www.fws.gov/southeast/pdf/west-](https://www.fws.gov/southeast/pdf/west-indian-manatee-reclassification-final-rule.pdf)  
244 [indian-manatee-reclassification-final-rule.pdf](https://www.fws.gov/southeast/pdf/west-indian-manatee-reclassification-final-rule.pdf)
- 245 8. Bonde R, Garrett A, Berlinger M, Askin N, Tan L, Wittnich C. Biomedical health assess-  
246 ments of the Florida manatee in Crystal River: Providing opportunities for training during  
247 the capture, handling, and processing of this unique aquatic mammal. *Journal of Marine*  
248 *Animals and Their Ecology*, 5(2), 17-28. (2012b).
- 249 9. Hostettler J. Updated statewide abundance estimates for the Florida manatee 2018  
250 <https://f50006a.eos-intl.net/F50006A/OPAC/Details/Record.aspx?BibCode=1864664>
- 251 10. Bossart G, Baden D, Ewing R, Roberts B, Wright D.  
252 Brevetoxicosis in manatees (*Trichechus manatus latirostris*) from the 1996 epizootic:  
253 gross, histologic, and immunohistochemical features. *Toxicologic Pathology* 1998 Mar-  
254 Apr; Vol. 26 (2), pp. 276-82.
- 255 11. Randall N, Blitvich B, Blanchong J. Efficacy of wildlife rehabilitation centers in  
256 surveillance and monitoring of pathogen activity: a case study with West Nile virus. J  
257 Wildl Dis. 2012 Jul;48(3):646-53.
- 258 12. Ball R. Thromboembolic Disease as a Component of Health Issues in the Florida  
259 Manatee (*Trichechus manatus latirostris*). Proceeding of IAAAM 2013.  
260 [https://www.vin.com/apputil/content/defaultadv1.aspx?pId=11375&meta=Generic&id=5](https://www.vin.com/apputil/content/defaultadv1.aspx?pId=11375&meta=Generic&id=5768576)  
261 [768576](https://www.vin.com/apputil/content/defaultadv1.aspx?pId=11375&meta=Generic&id=5768576)
- 262 13. Gerlach T, Bandt C, Conner B, Ball R. *Journal of the American Veterinary Medical*  
263 *Association*. 11/1/2015, Vol. 247 Issue 9, p1048-1065. 8p. DOI:  
264 10.2460/javma.247.9.1048.
- 265 14. Ball R, Walsh C, Flewelling L, Arnett L, Smith L et al. Clinical Pathology, Serum  
266 Brevetoxin, and Clinical Signs of Florida Manatees (*Trichechus manatus latirostris*)  
267 During the Brevetoxin-Related Mortality Event in Southwest Florida 2013. Proceeding  
268 IAAAM 2014.

269 [https://www.vin.com/apputil/content/defaultadv1.aspx?pId=11397&meta=Generic&id=6](https://www.vin.com/apputil/content/defaultadv1.aspx?pId=11397&meta=Generic&id=6251877)  
270 [251877](https://www.vin.com/apputil/content/defaultadv1.aspx?pId=11397&meta=Generic&id=6251877)

271

272

273

274 Supporting Information

275 S1. FWC Manatee Rescue and Salvage Program Map.

276 S2. Manatee admissions over the study period.

277 S3. Percent of manatees admitted by cause of admittance.

278 S4. Number of manatees admitted over study period by cause of admission.

279 S5. Number of manatees admitted each month by year.

280 S6. Manatees admitted by cause of admittance by month.

281

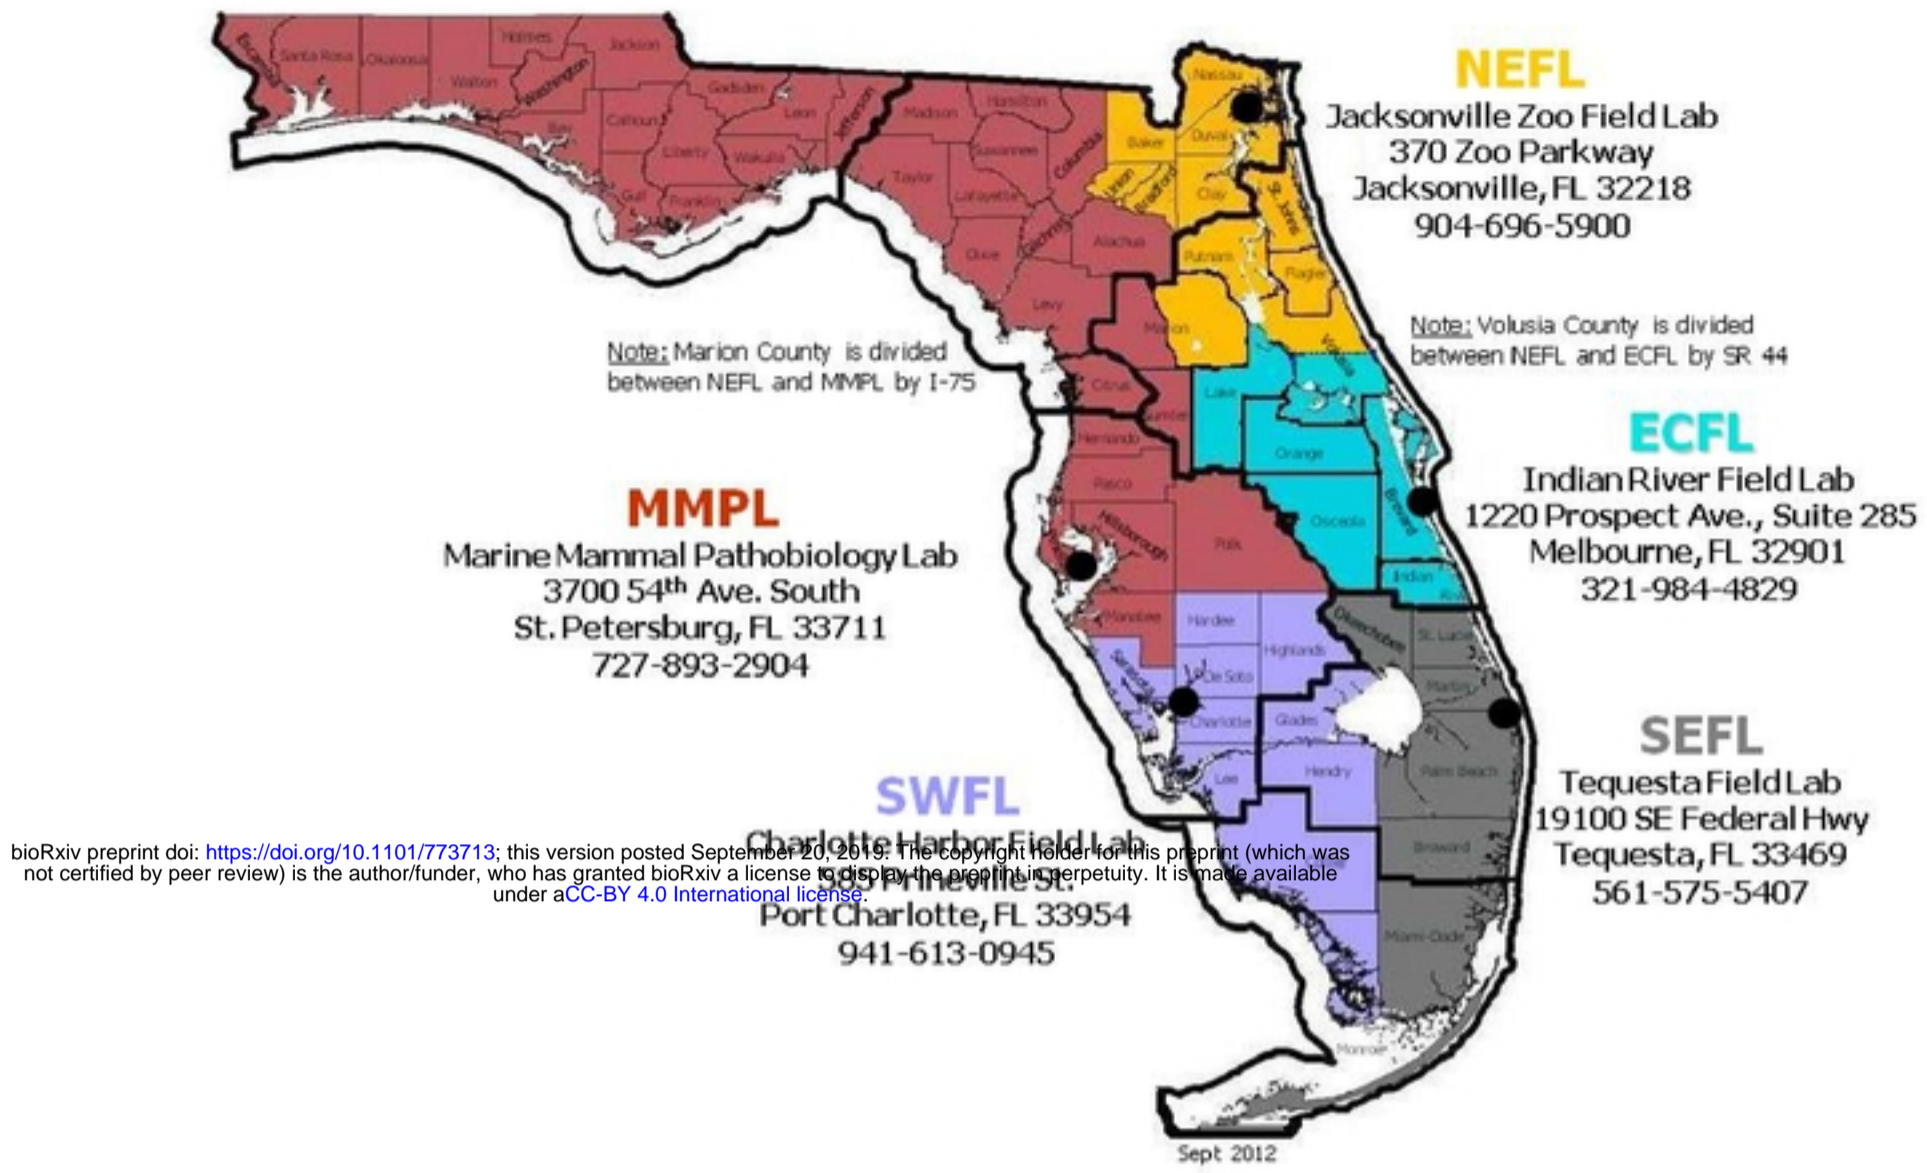

bioRxiv preprint doi: <https://doi.org/10.1101/773713>; this version posted September 20, 2019. The copyright holder for this preprint (which was not certified by peer review) is the author/funder, who has granted bioRxiv a license to display the preprint in perpetuity. It is made available under aCC-BY 4.0 International license.

Fig 1. Florida Fish and Wildlife Commission Rescue and Carcass Salvage Program map of Florida.

bioRxiv preprint doi: <https://doi.org/10.1101/773713>; this version posted September 20, 2019. The copyright holder for this preprint (which was not certified by peer review) is the author/funder, who has granted bioRxiv a license to display the preprint in perpetuity. It is made available under aCC-BY 4.0 International license.

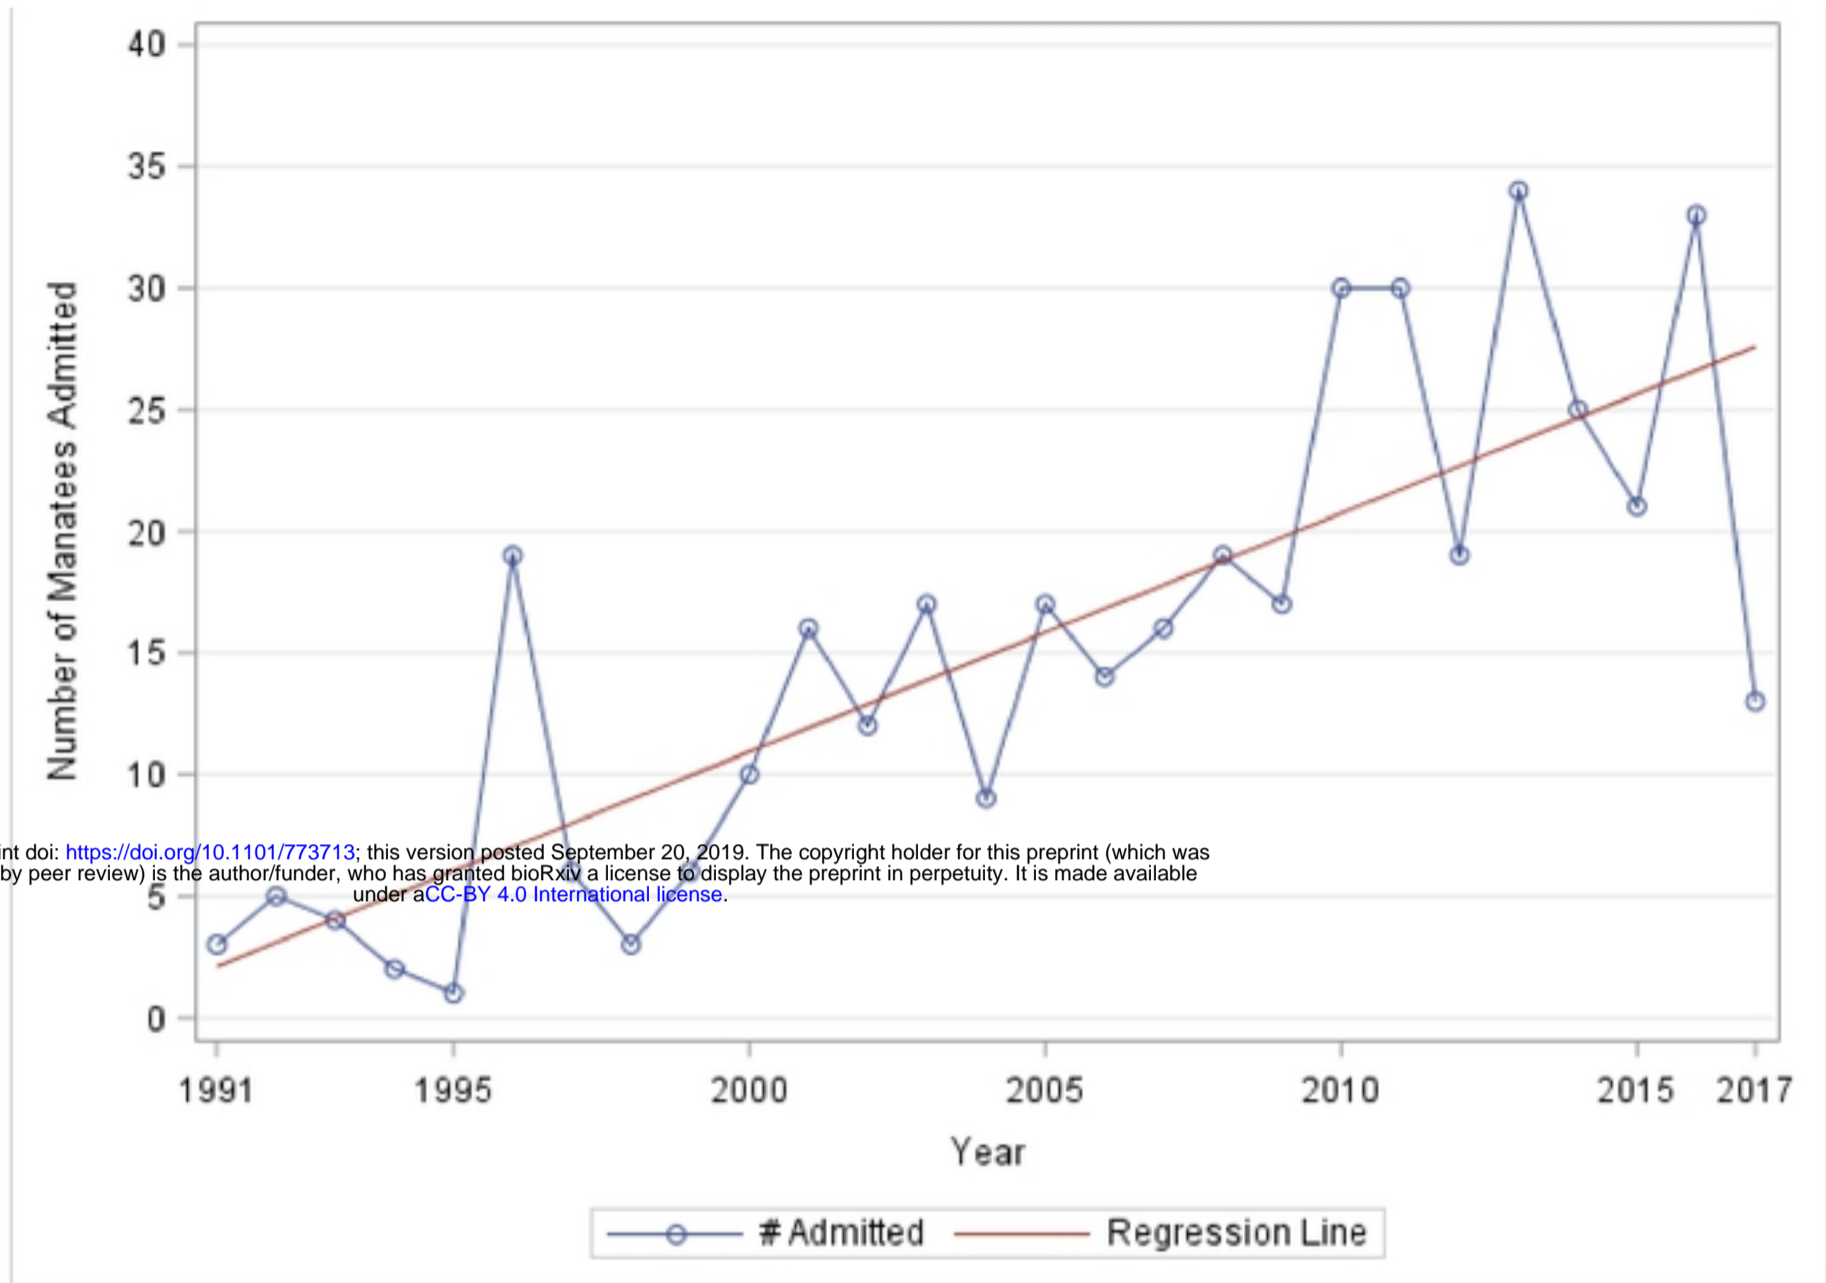

Fig 2. Admittance of manatees at ZooTampa from August 1991 through October 2017.



bioRxiv preprint doi: <https://doi.org/10.1101/773713>; this version posted September 20, 2019. The copyright holder for this preprint (which was not certified by peer review) is the author/funder, who has granted bioRxiv a license to display the preprint in perpetuity. It is made available under aCC-BY 4.0 International license.

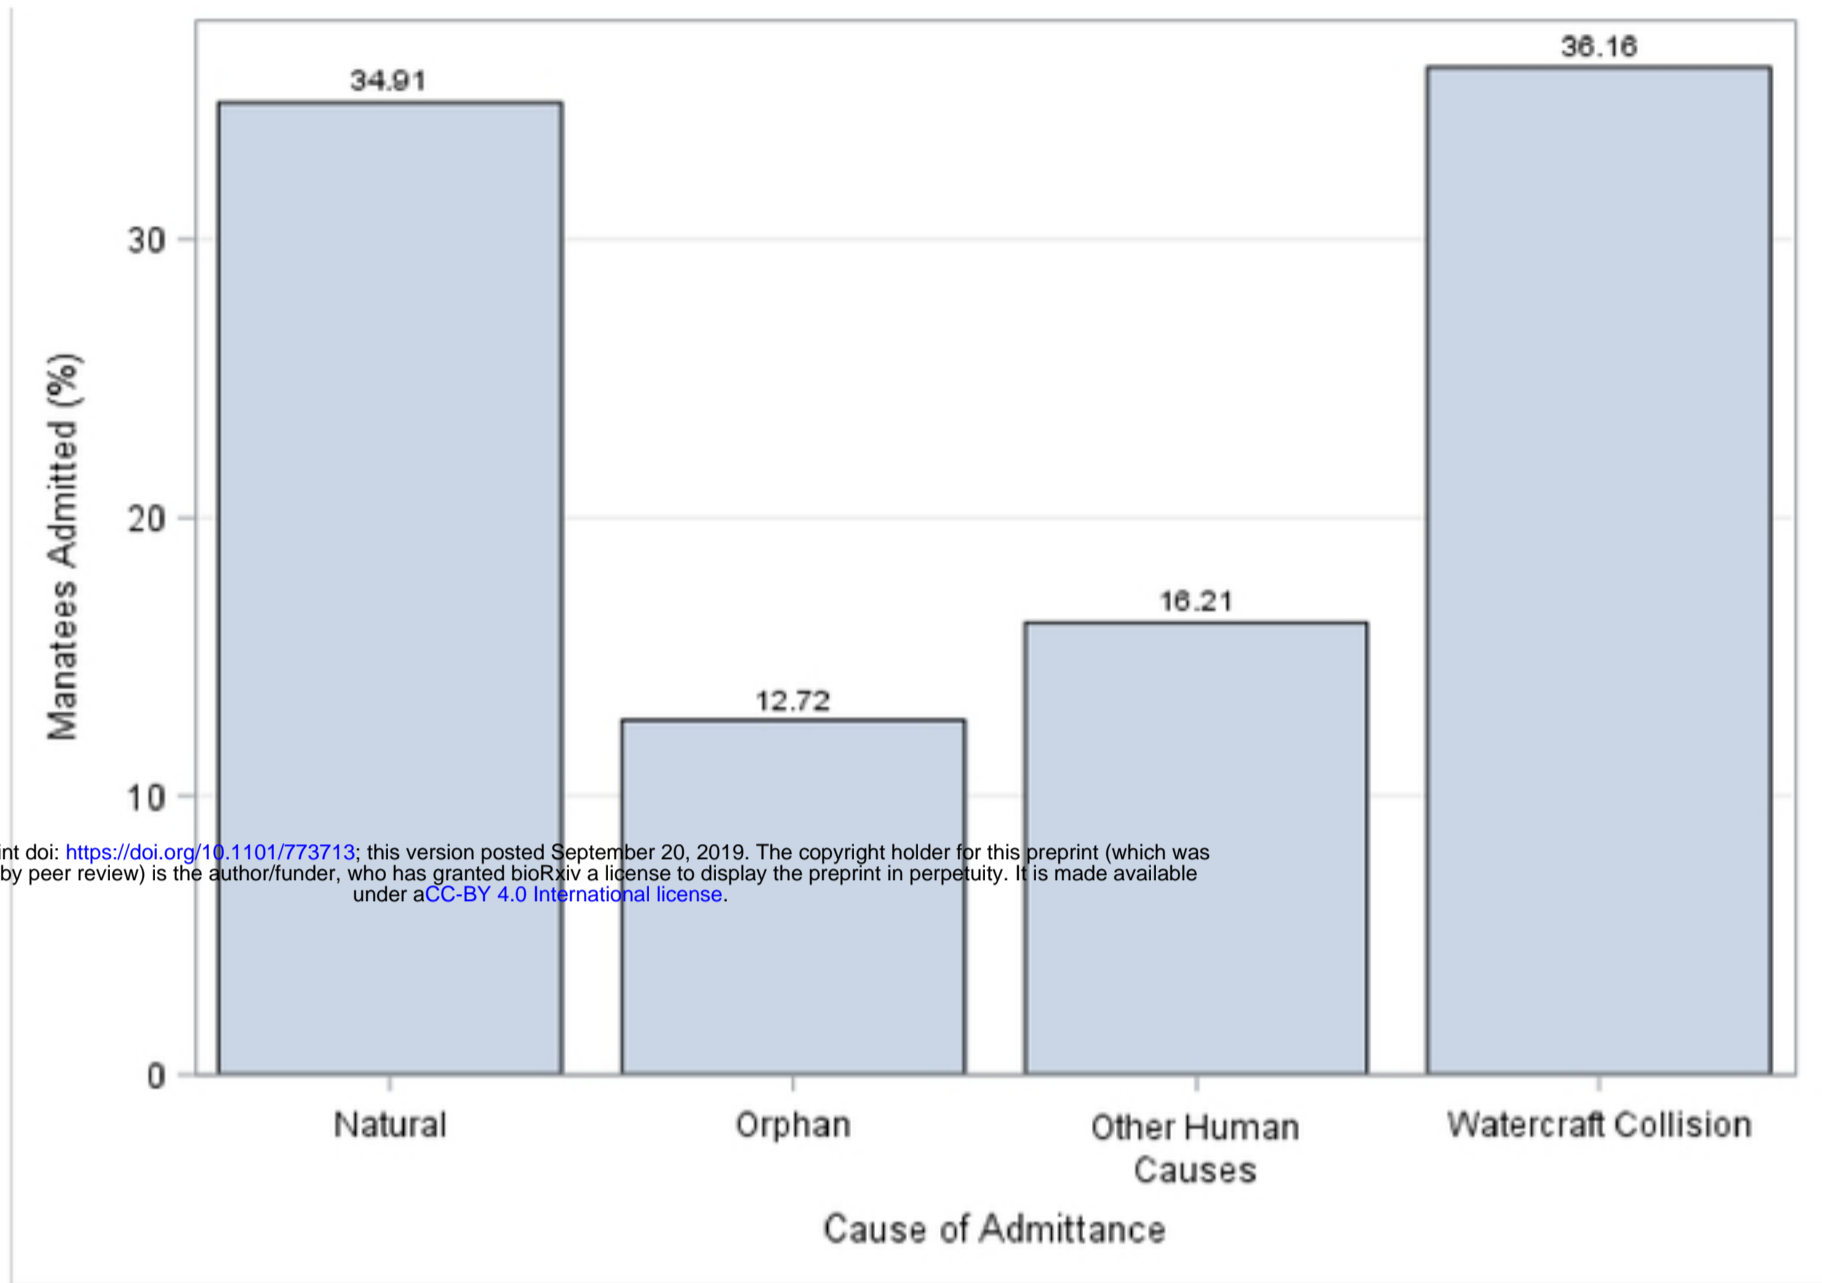

Fig. 3. Percent of manatees admitted at ZooTampa for rehabilitation by cause of admittance

bioRxiv preprint doi: <https://doi.org/10.1101/773713>; this version posted September 20, 2019. The copyright holder for this preprint (which was not certified by peer review) is the author/funder, who has granted bioRxiv a license to display the preprint in perpetuity. It is made available under aCC-BY 4.0 International license.

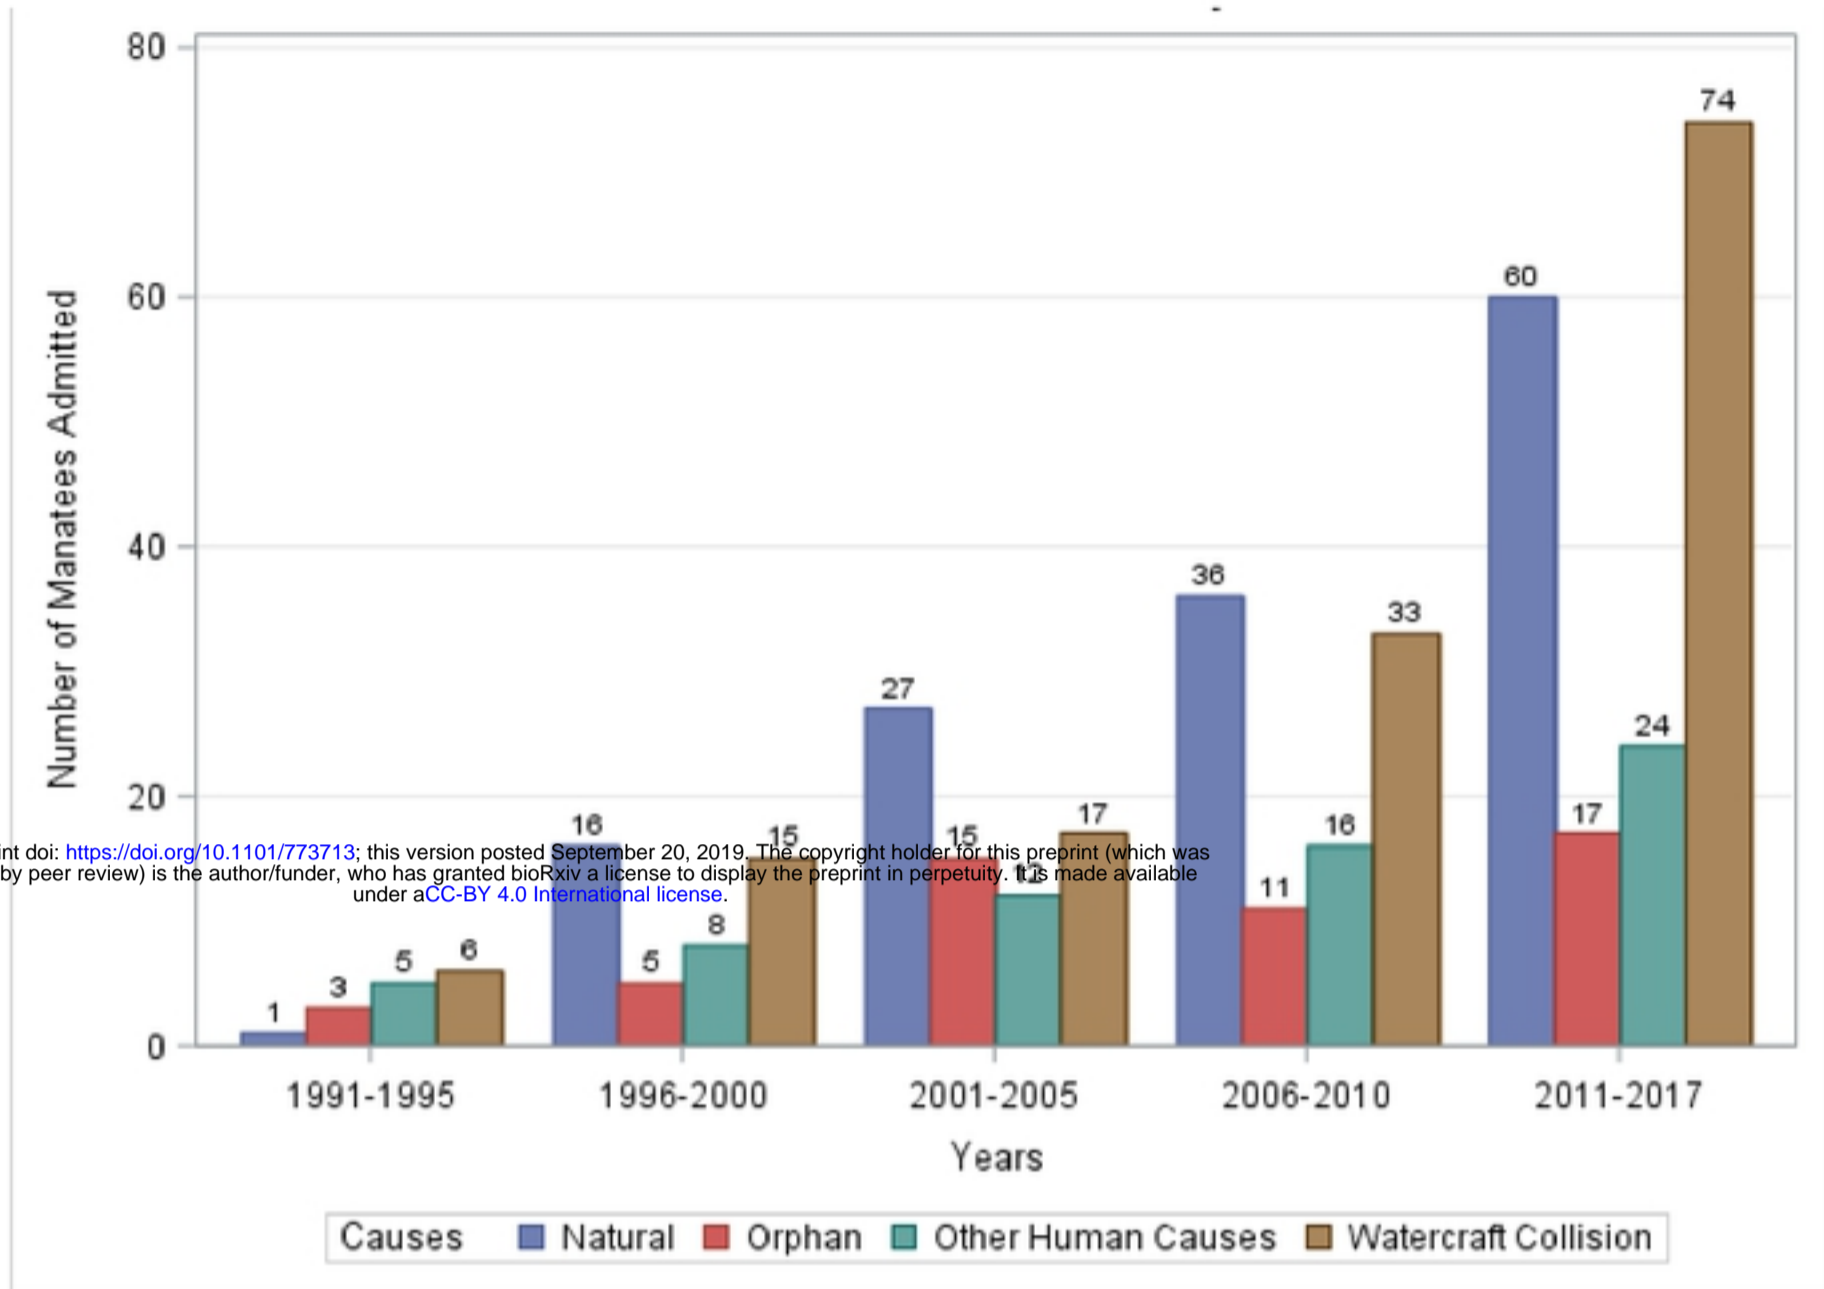

Fig 4. Manatees admitted to ZooTampa over time by cause of admittance

bioRxiv preprint doi: <https://doi.org/10.1101/773713>; this version posted September 20, 2019. The copyright holder for this preprint (which was not certified by peer review) is the author/funder, who has granted bioRxiv a license to display the preprint in perpetuity. It is made available under aCC-BY 4.0 International license.

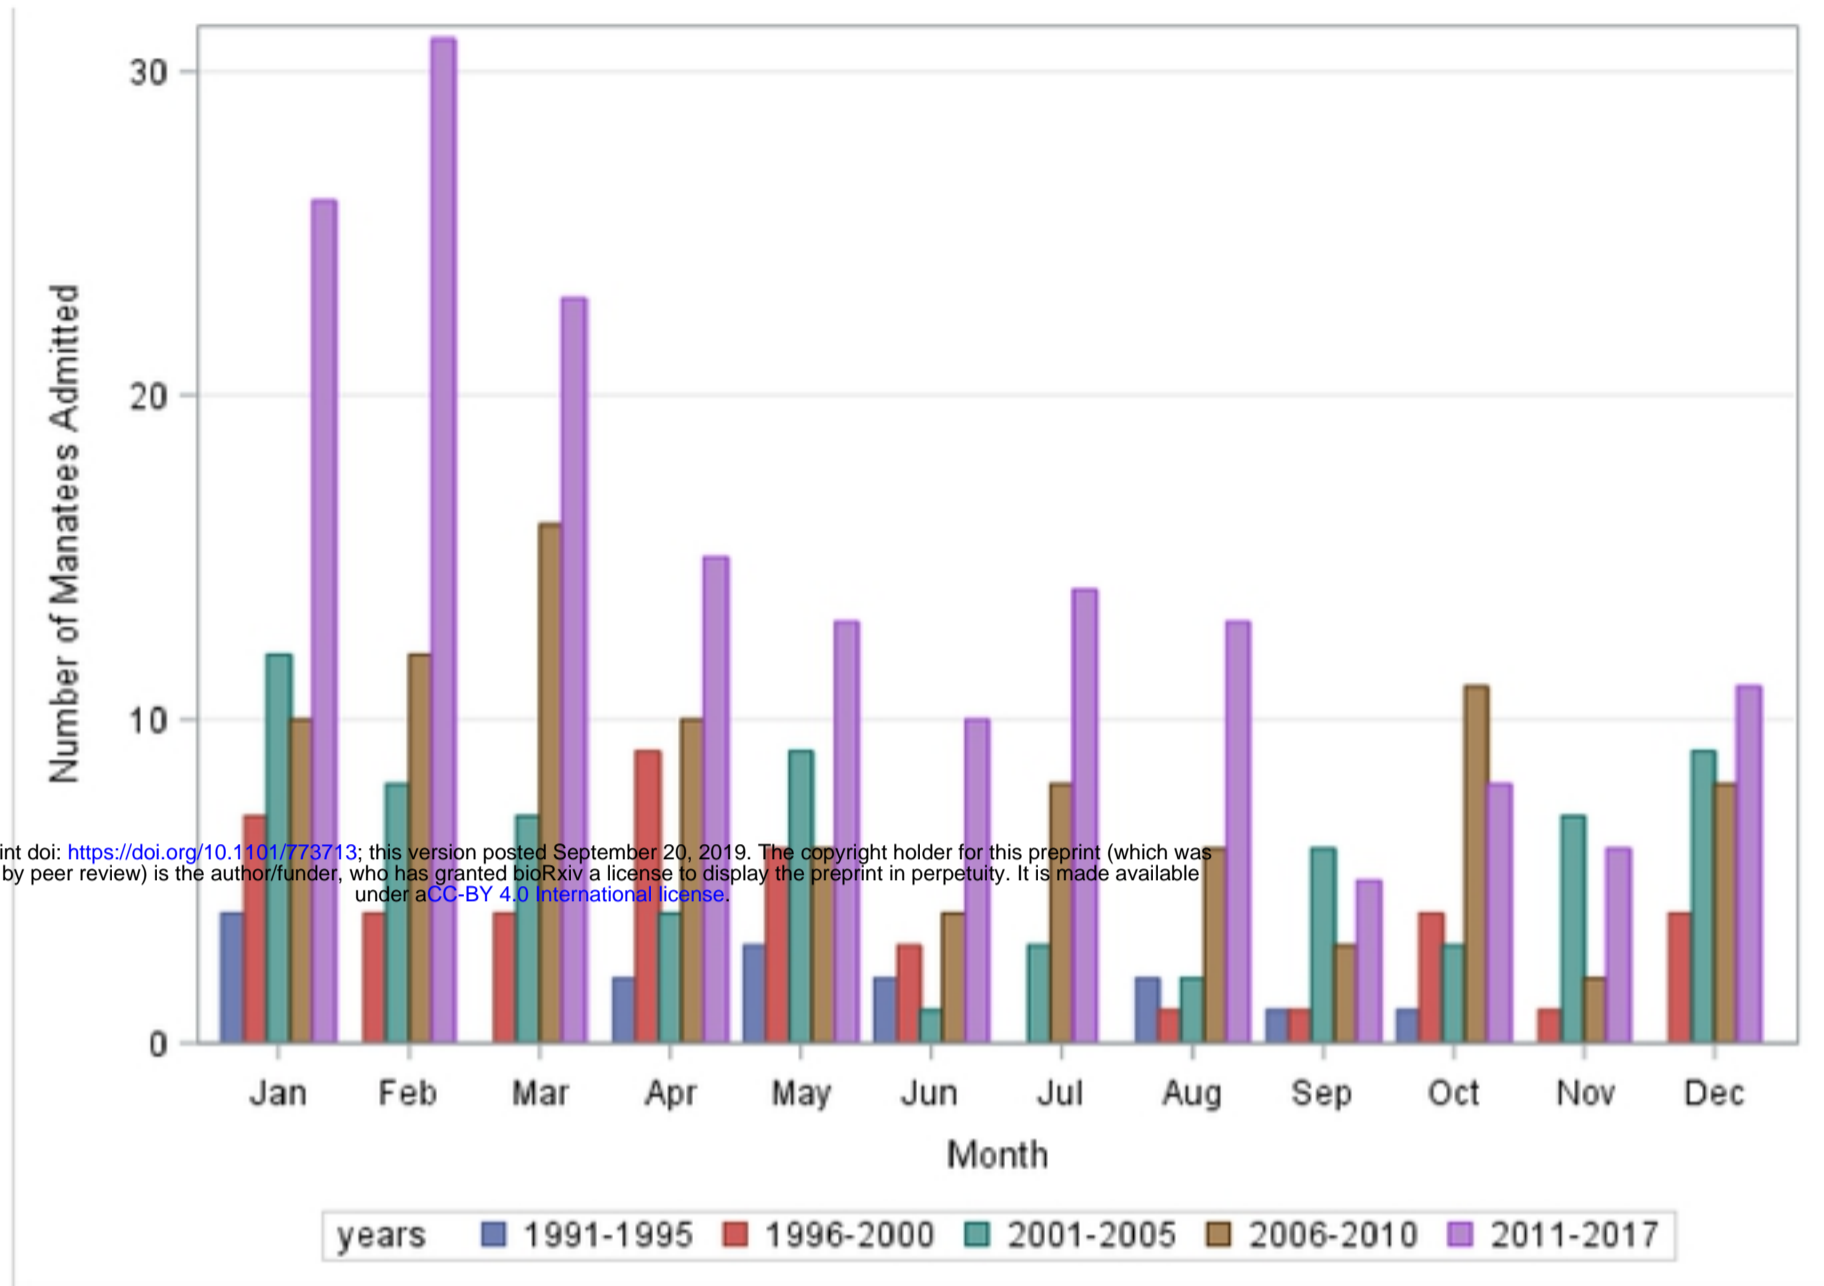

Fig 5. Seasonal variation in admittance of manatees to ZooTampa by month over the study period. January through April tend to be peak period for admissions.

bioRxiv preprint doi: <https://doi.org/10.1101/773713>; this version posted September 20, 2019. The copyright holder for this preprint (which was not certified by peer review) is the author/funder, who has granted bioRxiv a license to display the preprint in perpetuity. It is made available under aCC-BY 4.0 International license.

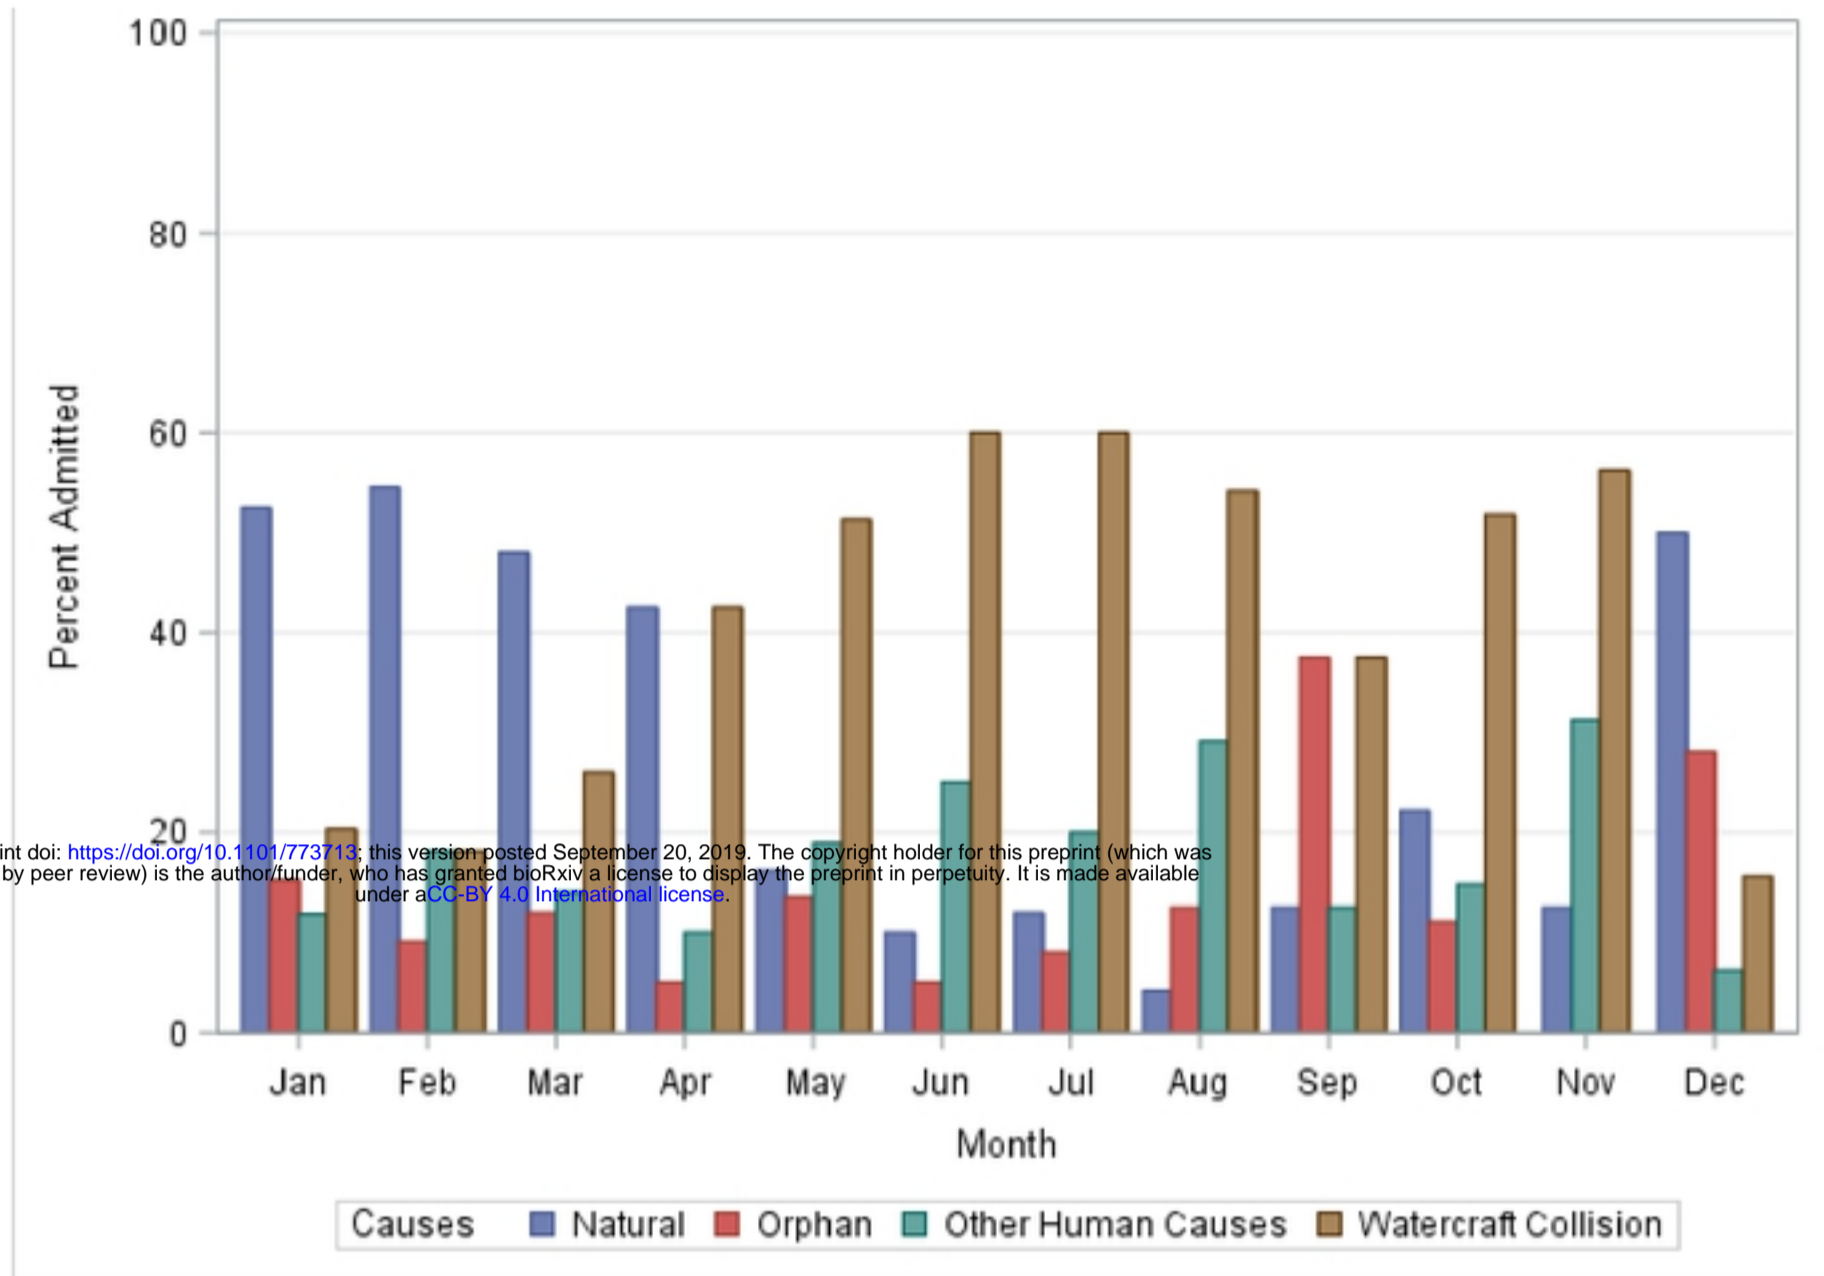

Fig 6. Total manatees admitted by cause summated by month for entire study period.
